# Supplementary material for: Co-inhibition of SMAD and MAPK signaling enhances 124I uptake in BRAF-mutant thyroid cancers
Source: PubMed Central journal article supplement (PMC8183640; doi:10.1530/erc-21-0017), 2021-04-23
Supplement: supplementary_figure_1.pdf [file supplementary_figure_1.pdf]

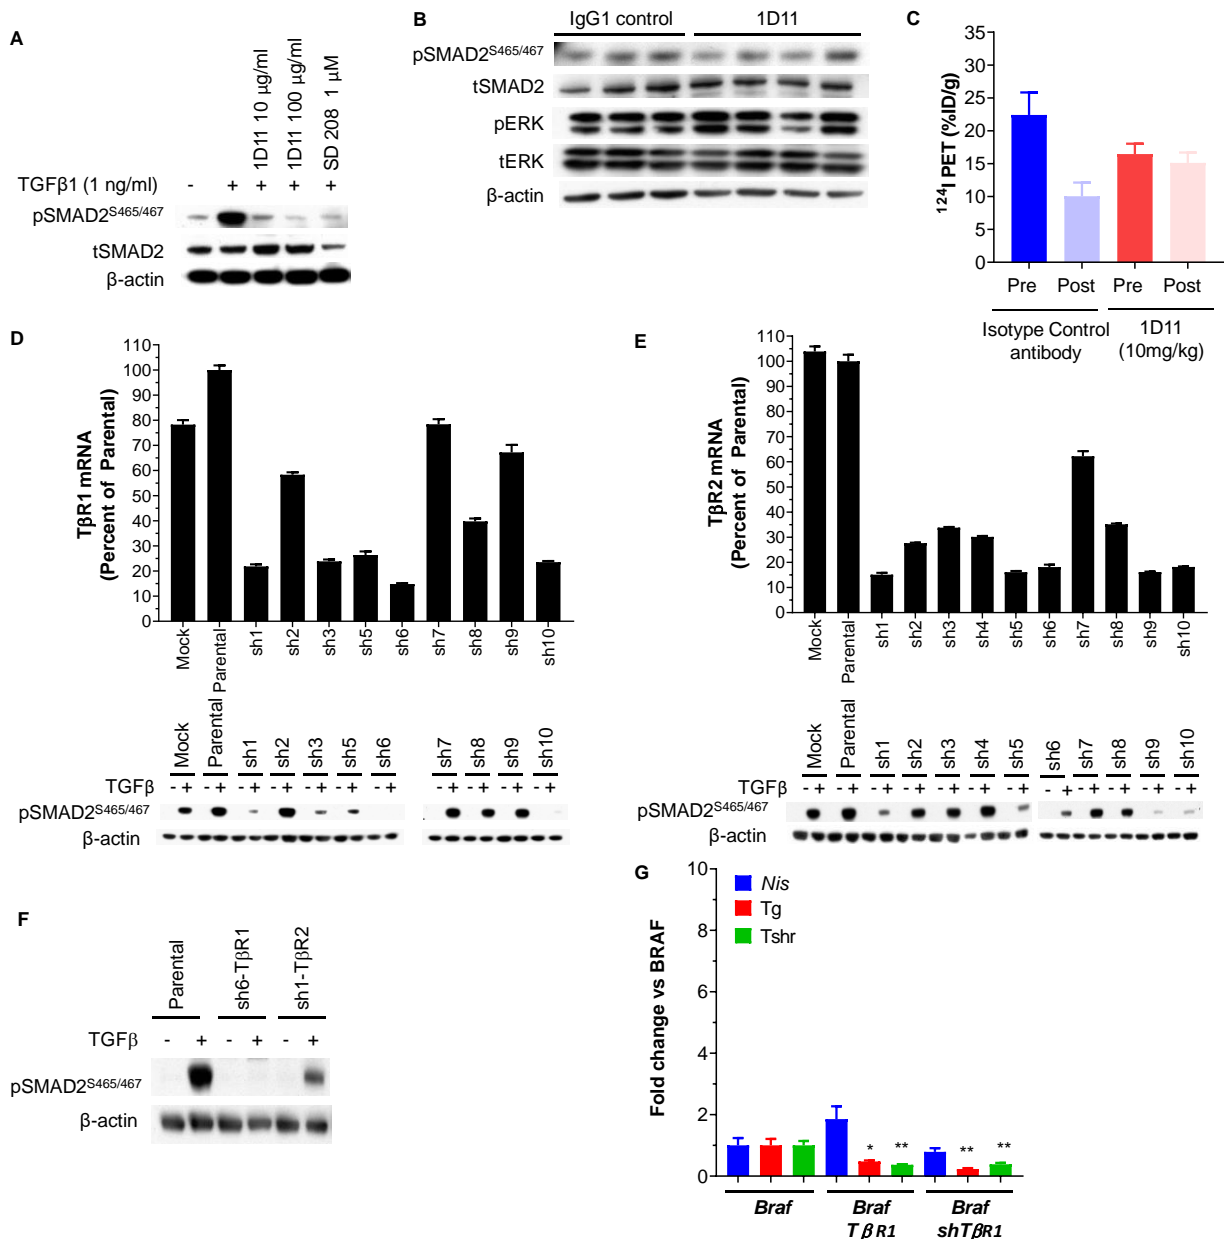

**Supp Figure 1: Targeting *Tgfβ* signaling in *BRAF<sup>V600E</sup>*-induced PTCs. **A**) Western blots of protein lysates from a cell line derived from a *Braf<sup>V600E</sup>* PTC incubated in serum free medium for 24h and then treated with TGFβ1 for 1 h in the absence or presence of the TGFβ1 blocking antibody 1D11 or the TGFβR1 kinase inhibitor SD208 (1 μM). **B, C**) Effect of TGFβ1 blockade on SMAD activation and <sup>124</sup>I incorporation *in vivo*. *Braf* mice were treated with isotype control IgG or 1D11 antibody once every 2d for 14d. **B**) Western blots of PTC lysates collected at day 14 probed with the indicated antibodies. **C**) Thyroid <sup>124</sup>I uptake (%ID/g ±SEM) in *Braf* mice before and after treatment with 1D11 or isotype control. <sup>124</sup>I uptake was measured by micro-PET 24 h post <sup>124</sup>I administration before and after 14d of treatment. Each cohort contained 4 mice. **D,E**) Knockdown efficiency screen shRNAs to *TgfβR1* (**D**) and *TgfβR2* (**E**) in mouse *Braf*-PTC cells. *Top*: Quantitative RT-PCR performed in triplicate. *Bottom*: Western blots for pSMAD of TGFβ1 treated cells. **F**) Comparison of *TgfβR1* and *TgfβR2* shRNAs on TGFβ1-induced SMAD activation in *Braf*-PTC cells. **G**) Quantitative RT-PCR of thyroid differentiation markers in PTCs from *Braf*, *Braf/TβR1* and *Braf/shTβR1* mice. Four mouse thyroid tissues from each genotype were analyzed in triplicate. Unpaired t test with Welch's correction: \*p<0.05, \*\* p<0.01 compared to *Braf* mice.**
