# Supplementary material for: Co-inhibition of SMAD and MAPK signaling enhances 124I uptake in BRAF-mutant thyroid cancers
Source: PubMed Central journal article supplement (PMC8183640; doi:10.1530/erc-21-0017), 2021-04-23
Supplement: supplementary_figure_2.pdf [file supplementary_figure_2.pdf]

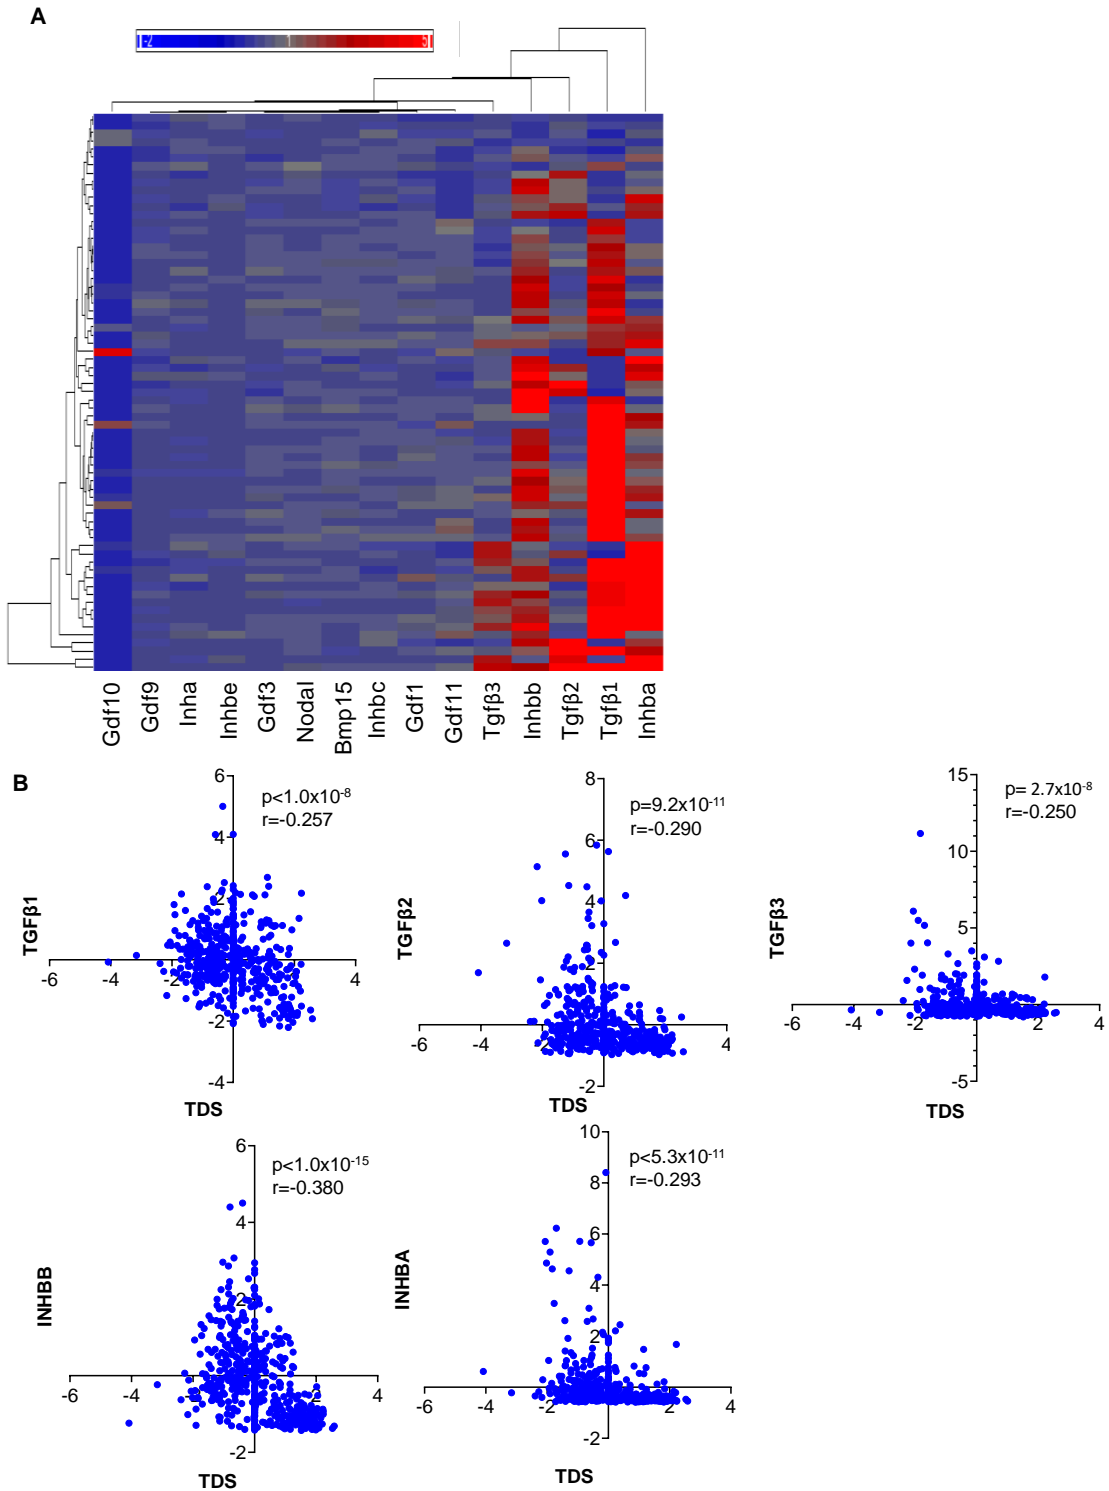

**Supp Figure 2: TGFβ family ligand expression is anticorrelated with thyroid differentiation score (TDS) in PTC. A)** Heat map of TGFβ family ligand mRNA expression in human PTCs compared to normal thyroid tissues. Fold-change in mRNAs was calculated from public transcriptomic data (GSE29265, GSE33630, GSE65144). **B)** Pearson correlation coefficient between expression of the indicated TGFβ ligands and TDS using the TCGA PTC dataset (Network CGAR (2014). Integrated genomic characterization of papillary thyroid carcinoma. *Cell* **159**: 676-690).
