# Supplementary material for: Co-inhibition of SMAD and MAPK signaling enhances 124I uptake in BRAF-mutant thyroid cancers
Source: PubMed Central journal article supplement (PMC8183640; doi:10.1530/erc-21-0017), 2021-04-23
Supplement: supplementary_figure_3.pdf [file supplementary_figure_3.pdf]

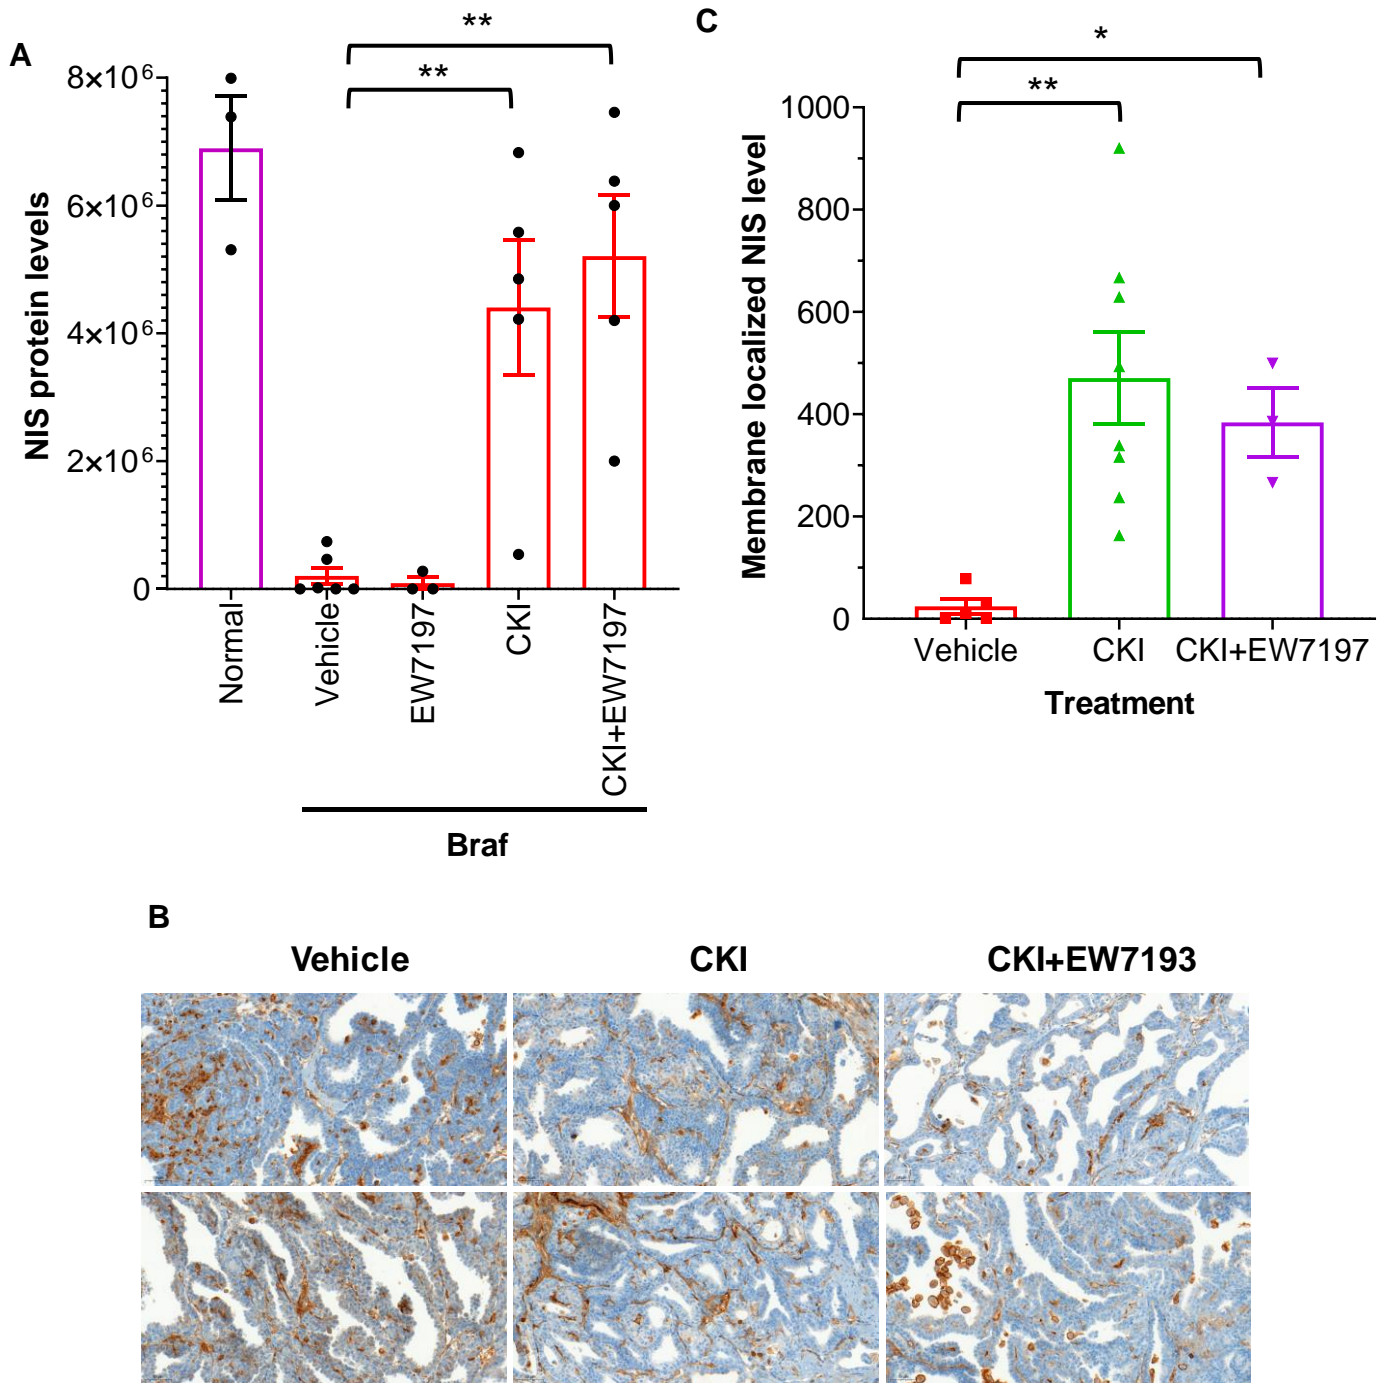

**Supp Figure 3:** Quantification of NIS protein levels in Western blots of CKI and EW7197-treated *Braf* mice. **A)** Bars represent the mean vinculin normalized expression of NIS  $\pm$ SEM from the Western blots shown in Fig 4E. **B)** Immunohistochemistry for CD45 in PTCs from *Braf* mice treated with vehicle, CKI or CKI+EW7197. **C)** Membrane expression of NIS (mean  $\pm$ SEM) from co-immunofluorescence staining in Fig 4F. \* $p < 0.05$ , \*\*  $p < 0.002$
